# Supplementary material for: Antibodies against Food Antigens in Patients with Autistic Spectrum Disorders
Source: Hindawi journal article supplement (doi:10.1155/2013/729349), 2013-01-01
Supplement: f1 [file 729349.f1.pdf]

## Supplemental Material

**Table.** Normal range cut off values by age, reported for the investigated IgE, IgA and IgG.

| <b>Total IgE normal range: cut off by age</b> |                                                          |
|-----------------------------------------------|----------------------------------------------------------|
| 0 – 2 years                                   | <40 KU/l                                                 |
| 3 - 5                                         | <80                                                      |
| 6 – 13                                        | <100                                                     |
| 14 - 20                                       | <120                                                     |
| 21 – 40                                       | <260                                                     |
| <b>Specific IgE: Range based evaluation</b>   |                                                          |
| < 0.10 KUA/l                                  | Normal values                                            |
| 0.10 - 0.35                                   | Low levels of IgE to be correlated with clinical aspects |
| 0.35 - 0.7                                    | Low                                                      |
| 0.7 - 3.5                                     | Moderate                                                 |
| 3.5 - 17.5                                    | High >                                                   |
| 17.5 - 100                                    | High >>                                                  |
| > 100                                         | High >>>                                                 |
| <b>Total IgA normal range: cut off by age</b> |                                                          |
| 1 - 3 years                                   | 20-100 mg/dl                                             |
| 4 - 6                                         | 27-195                                                   |
| 7 - 9                                         | 34-305                                                   |
| 10 - 11                                       | 53-204                                                   |
| 12 - 13                                       | 58-358                                                   |
| 14 - 15                                       | 47-249                                                   |
| <b>Total IgG normal range: cut off by age</b> |                                                          |
| 1 - 3 years                                   | 453-916 mg/dl                                            |
| 4 - 6                                         | 504-1495                                                 |
| 7 - 9                                         | 572-1474                                                 |
| 10 - 11                                       | 698-1560                                                 |
